# Supplementary material for: Factors influencing willingness to intervene as bystanders among adult residents living in crash-prone areas in the Ashanti region of Ghana
Source: PubMed Central journal article supplement — Afr J Emerg Med. 2022 Jul 20;12(4):315–20. doi: 10.1016/j.afjem.2022.06.010 (PMC9307561; doi:10.1016/j.afjem.2022.06.010), 2022-07-20
Supplement: mmc1.pdf [file mmc1.pdf]

**APPENDIX: Questions used to assess first aid knowledge**

1. What type of injuries need first aid? You can choose more than one option

- a. Bleeding
- b. Fracture
- c. Human/animal bite
- d. Burns
- e. Neck and back/spine injury
- f. Breathing difficulty
- g. Others, specify.....

2. One measure to stop bleeding is pressing firmly with a clean bandage on the bleeding part.

- a. Yes
- b. No
- c. Don't know

3. Placing an unconscious but breathing patient in the recovery position is a first aid protocol.

- a. Yes
- b. No
- c. Don't know

4. For a person with neck and back injury avoiding head and neck movement and keeping the body straight is a measure of first aid.

- a. Yes
- b. No
- c. Don't know

5. Pouring water on an unconscious injured person will help them recover faster.

- a. Yes
- b. No
- c. Don't know

6. What is the very first thing you should do when you witness a road traffic accident scene?

- a. Remove any hazard and call an ambulance
- b. Call an ambulance before removing any hazard
- c. Carry the victims to the hospital
- d. Call other emergency responders, State .....
- e. None

7. You can check for the pulse of an unresponsive patient at the neck.

- a. Yes
- b. No
- c. Don't know

8. You can check for responsiveness from an injured person by shaking the victim.

- a. Yes
- b. No
- c. Don't know

9. When providing First Aid to an unresponsive but breathing victim, how should you position them?

- a. Placing them in recovery position
- b. Leaving them in the position found
- c. Placing them at their back

10. What is the best way to stop external bleeding?

- a. By applying direct pressure to the wound
- b. Wait for an ambulance to come
- c. Using water to clean the blood
- d. Others, State.....

11. Which of these are first-aid priorities? Responder can choose the best three.

- a. Chest compression
- b. Breathing maintenance
- c. Stopping bleeding
- d. Splinting fracture
- e. Transport to hospital
- f. Wound management
- g. Don't know
